# Supplementary material for: Cobalt phosphide as a highly active non-precious metal cocatalyst for photocatalytic hydrogen production under visible light irradiation
Source: Royal Society of Chemistry journal article supplement (doi:10.1039/c4ta07149b), 2015-01-01
Supplement: c4ta07149b1.pdf [file c4ta07149b1.pdf]

## Supporting Information

### Cobalt phosphide as a highly active non-precious-metal cocatalyst for photocatalytic hydrogen production under visible light irradiation

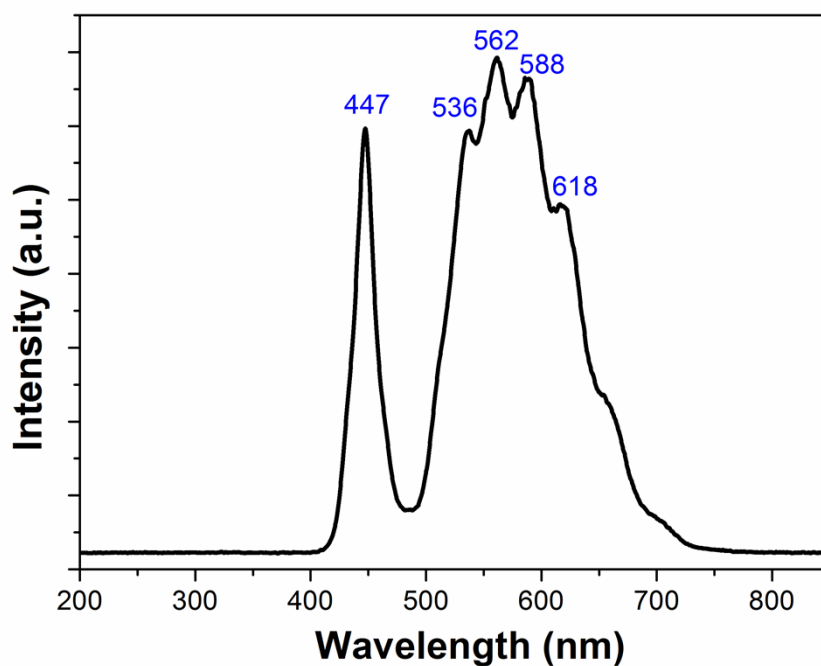

**Figure S1.** The emission spectrum of the white LED light.

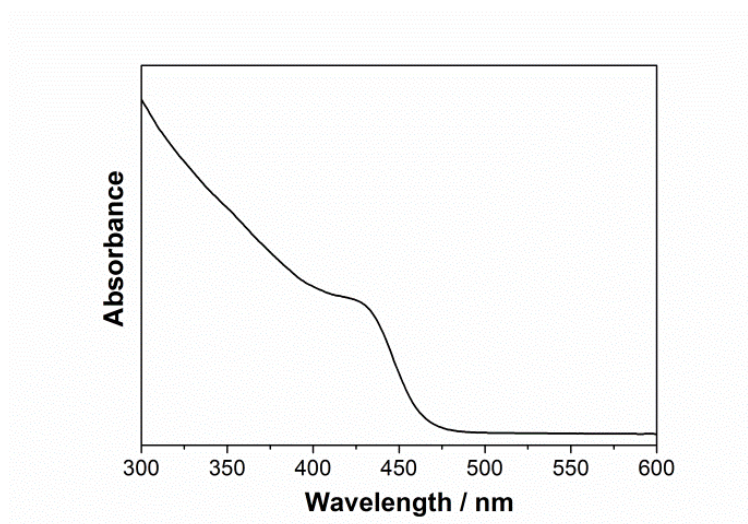

**Figure S2.** UV-vis spectrum of the obtained CdS NRs.

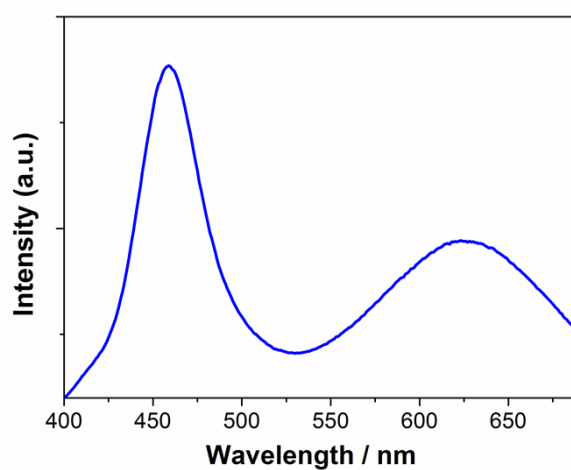

**Figure S3.** Fluorescent spectrum of the CdS NRs excited at 365 nm.

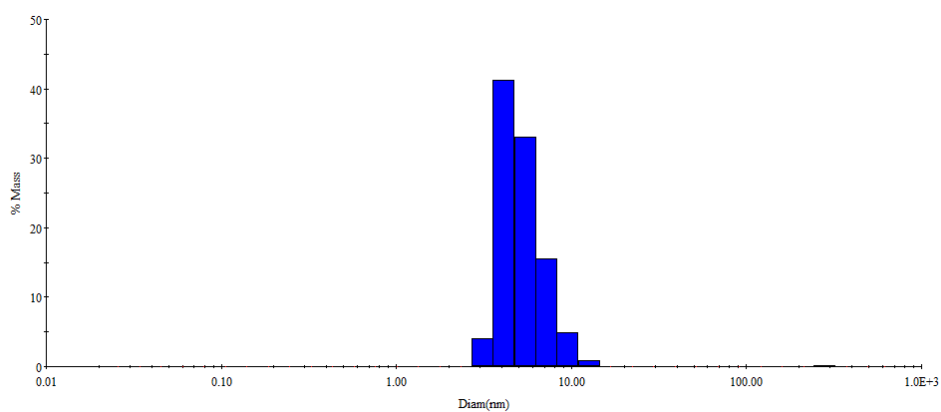

**Figure S4.** Dynamic light scattering (DLS) measurement of the Co<sub>2</sub>P NPs.

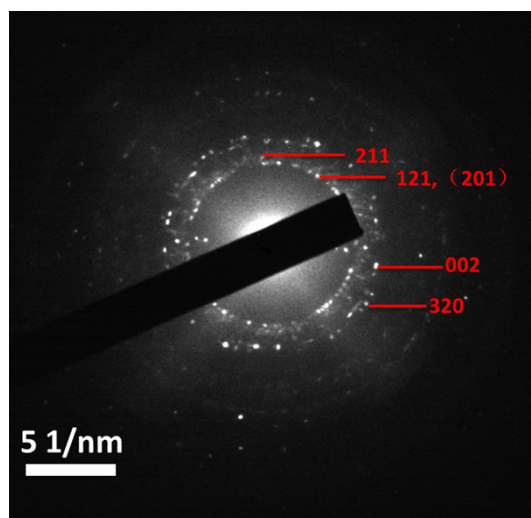

**Figure S5.** SAED pattern recorded from the Co<sub>2</sub>P NPs.

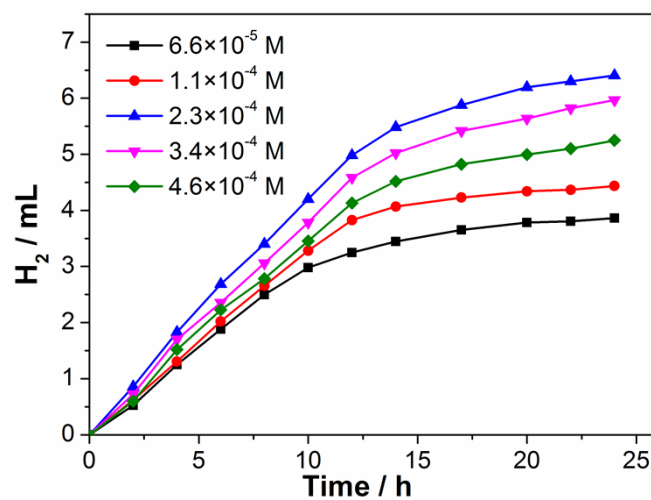

**Figure S6.** H<sub>2</sub> evolution as a function of CdS NRs concentrations for the system containing  $1.0 \times 10^{-4}$  M Co<sub>2</sub>P NPs and 0.5 M DL-mandelic acid at pH 6.0 in 15 mL aqueous solution under visible light irradiation.

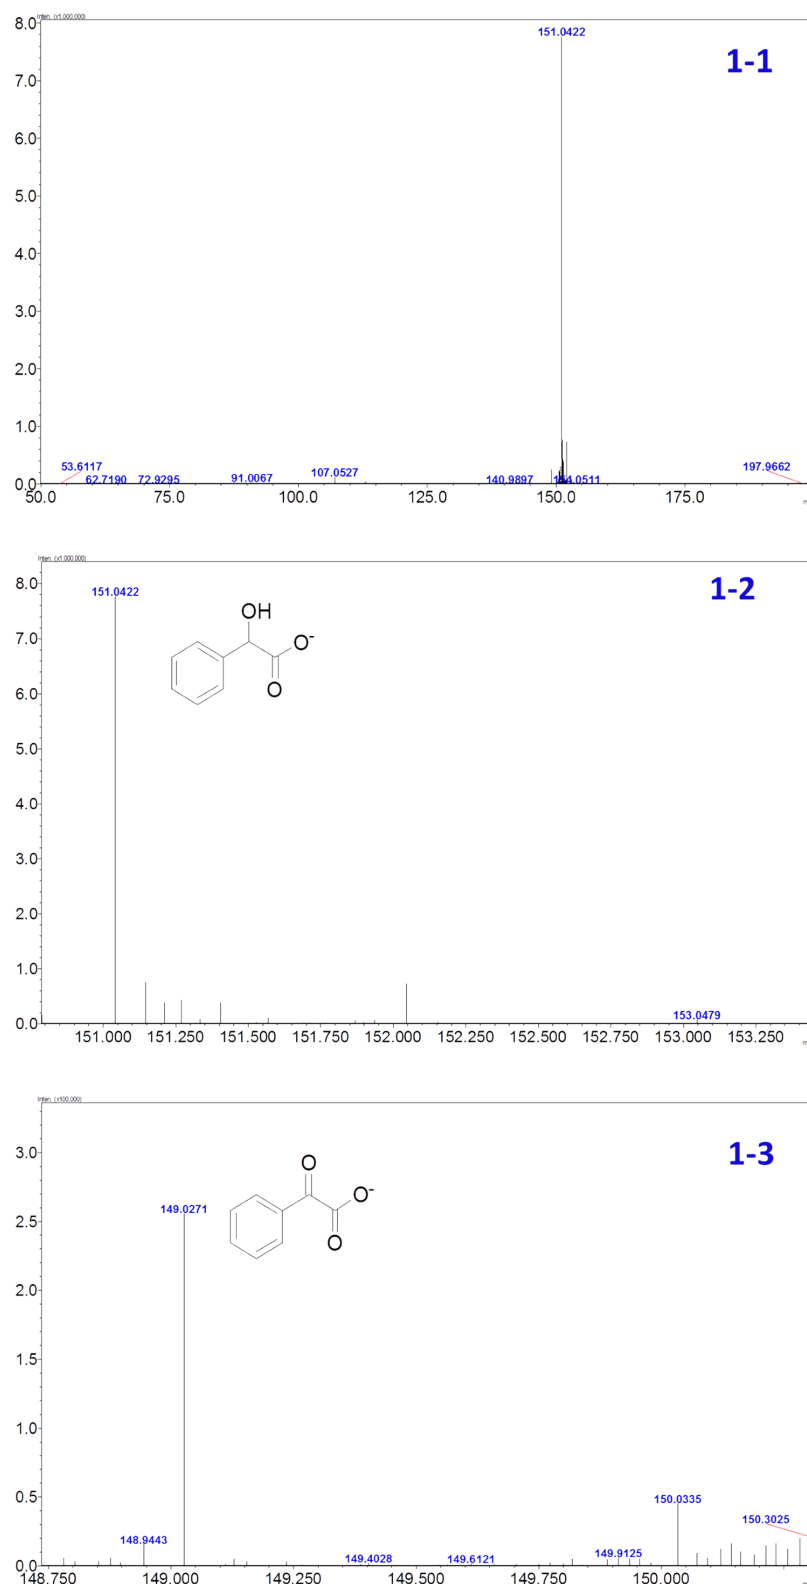

**Figure S7.** ESI-MS spectra of the reaction solution after 10 h of photocatalytic reaction for the system containing  $2.3 \times 10^{-4}$  M CdS NRs,  $1.0 \times 10^{-4}$  M Co<sub>2</sub>P NPs and 0.5 M DL-mandelic acid. The signals with m/z at 149 and 151 are assigned to benzoylformic acid and DL-mandelic acid, respectively. Figures (1-2, 1-3) are the amplification of Figure (1-1), respectively.

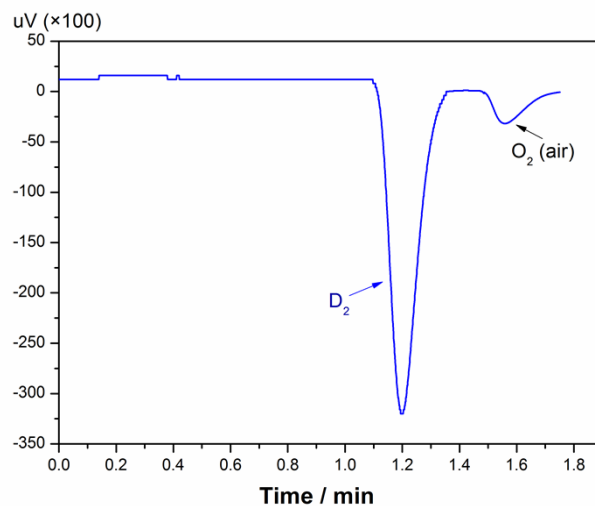

**Figure S8.** GC signals obtained using He (instead of Ar) as the carrier gas. The system contained  $2.3 \times 10^{-4}$  M CdS NRs,  $1.0 \times 10^{-4}$  M Co<sub>2</sub>P NPs and 0.5 M DL-mandelic acid in 6 mL D<sub>2</sub>O solution.

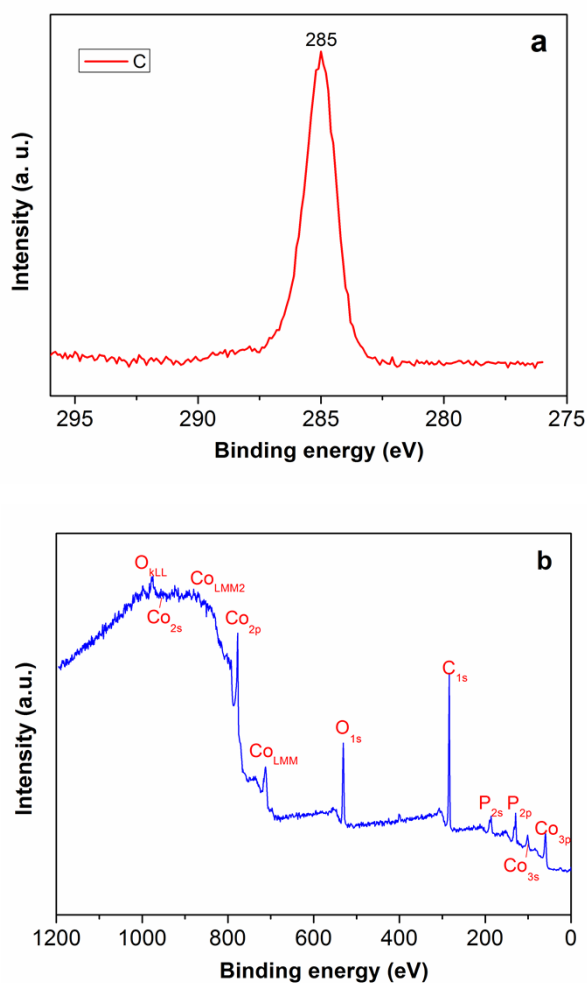

**Figure S9.** XPS spectrum of the (a) C (1s) regions and (b) survey spectrum of the obtained Co<sub>2</sub>P nanoparticles.
